# Supplementary material for: Hollow waxberry-like cobalt–nickel oxide/S,N-codoped carbon nanospheres as a trifunctional electrocatalyst for OER, ORR, and HER
Source: Royal Society of Chemistry journal article supplement (doi:10.1039/d0ra03222k), 2020-01-01
Supplement: d0ra03222k1.pdf [file d0ra03222k1.pdf]

Supporting Information for

**Hollow Waxberry-Like Cobalt-Nickel Oxide/S, N-Codoped Carbon  
Nanospheres as Trifunctional Electrocatalyst for OER, ORR, and HER**

*Qing Zhang,<sup>a</sup> Wenjie Han,<sup>a</sup> Zhixiao Xu,<sup>b</sup> Yinling Li,<sup>a</sup> Lu Chen,<sup>c</sup> Zhengyu Bai,<sup>a\*</sup> Lin  
Yang,<sup>a</sup> Xiaolei Wang<sup>b,c\*</sup>*

---

<sup>a</sup>Collaborative Innovation Center of Henan Province for Green Manufacturing of Fine Chemicals, Henan Key Laboratory of Boron Chemistry and Advanced Energy Materials, Key Laboratory of Green Chemical Media and Reactions, Ministry of Education, School of Chemistry and Chemical Engineering, Henan Normal University, Xinxiang, Henan 453007, PR China.

<sup>b</sup>Department of Chemical and Materials Engineering, University of Alberta, Edmonton, Alberta T6G 1H9, Canada.

<sup>c</sup>Department of Chemical and Materials Engineering, Concordia University, Montreal, Quebec H3G 1M8, Canada.

\*Corresponding author:

E-mail addresses: [baizhengyu@htu.edu.cn](mailto:baizhengyu@htu.edu.cn) (Z. Bai), [xiaolei.wang@ualberta.ca](mailto:xiaolei.wang@ualberta.ca) (X. Wang).

Figure Captions:

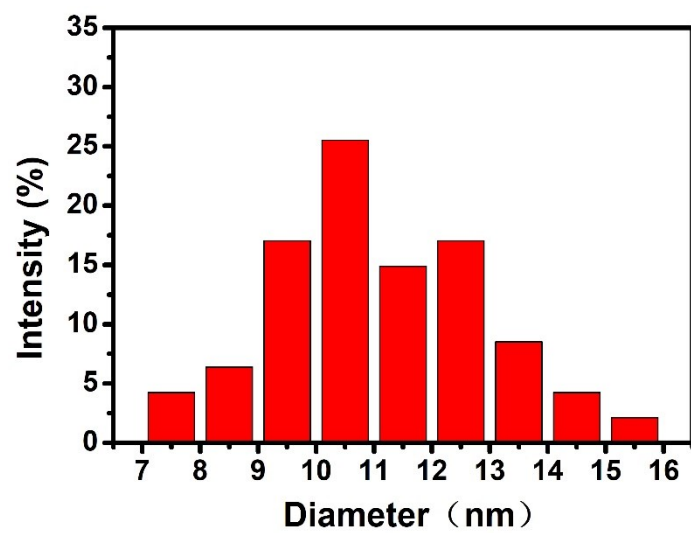

**Figure S1.** particle size distribution image of the Co-Ni glycerate surface nanoparticles.

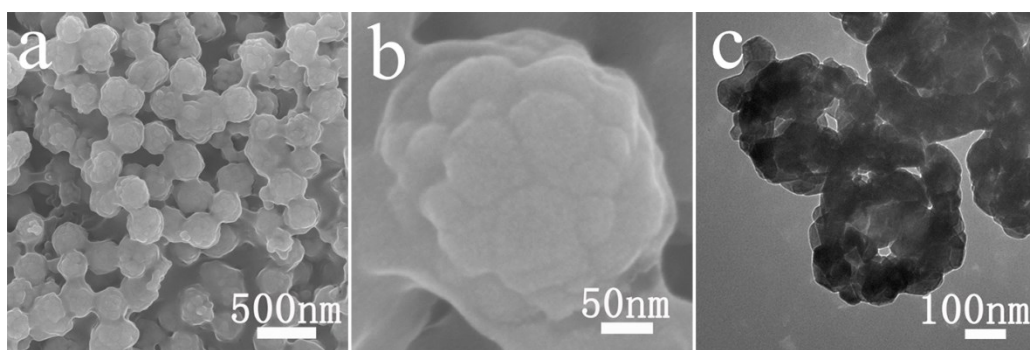

**Figure S2.** SEM (a,b) and TEM (c) image of the  $\text{CoNiO}_x/\text{NC}$  nanocomposites.

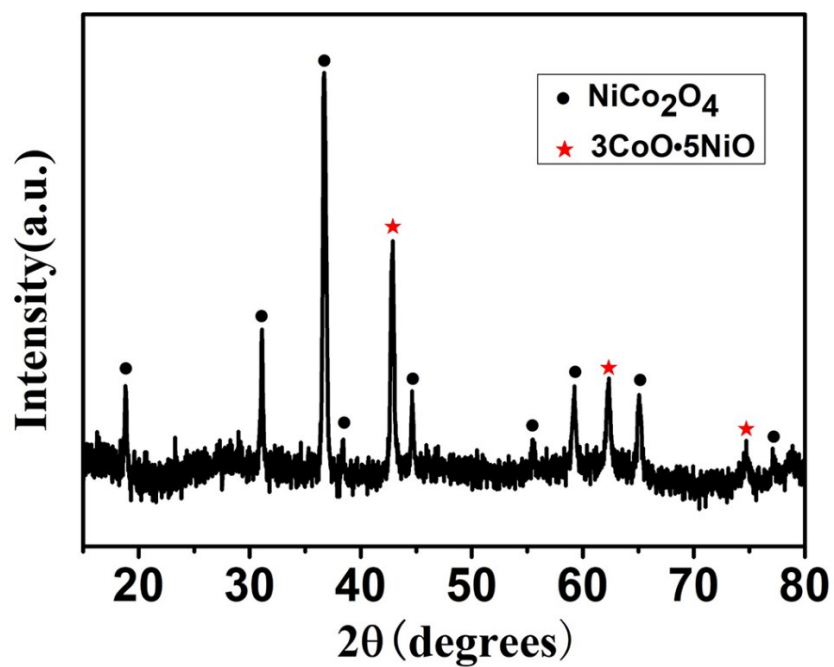

Figure S3. XRD image of the  $\text{CoNiO}_x/\text{NC}$  nanocomposites.

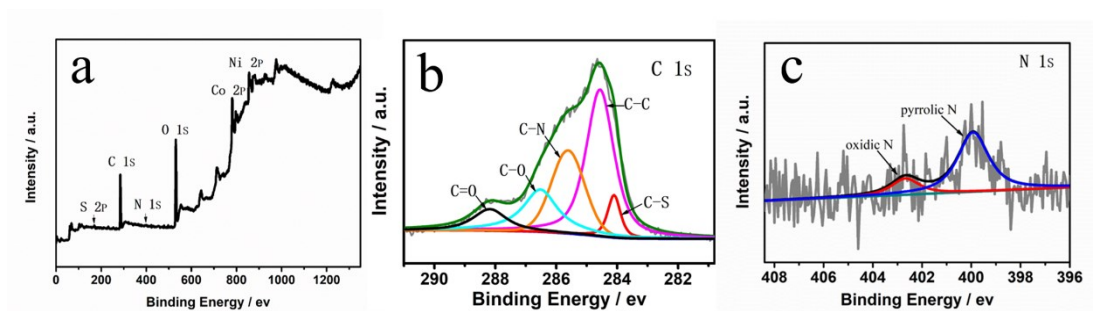

**Figure S4.** XPS survey-level scan(a) and High resolution XPS spectras of element C (b), N (c) of CoNiO<sub>2</sub>/SNC nanocomposites.

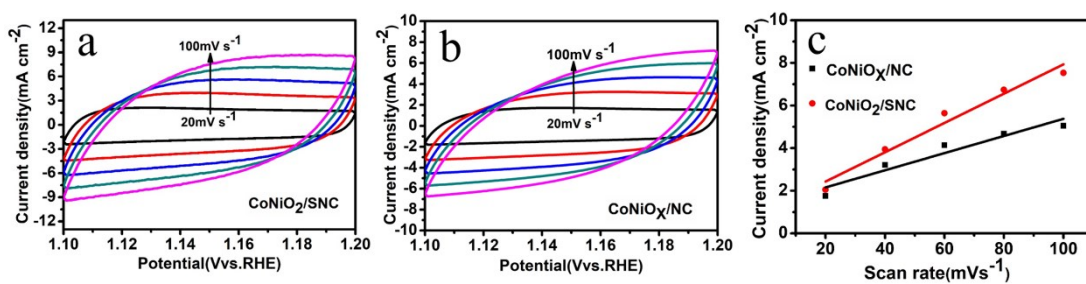

**Figure S5.** CV curves and plots of the current density of the CoNiO<sub>2</sub>/SNC and CoNiO<sub>x</sub>/NC. CV curves of (a) the CoNiO<sub>2</sub>/SNC and (b) CoNiO<sub>x</sub>/NC in N<sub>2</sub>-saturated 1 M KOH electrolyte at different scan rates. (c) Plots of current density as a function of scan rates for the CoNiO<sub>2</sub>/SNC and CoNiO<sub>x</sub>/NC.

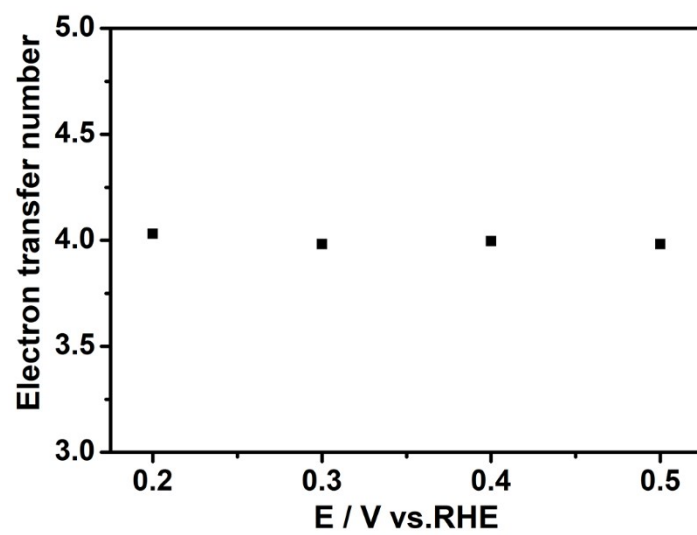

**Figure S6.** Electron transfer number at different potentials of CoNiO<sub>2</sub>/SNC nanocomposites.

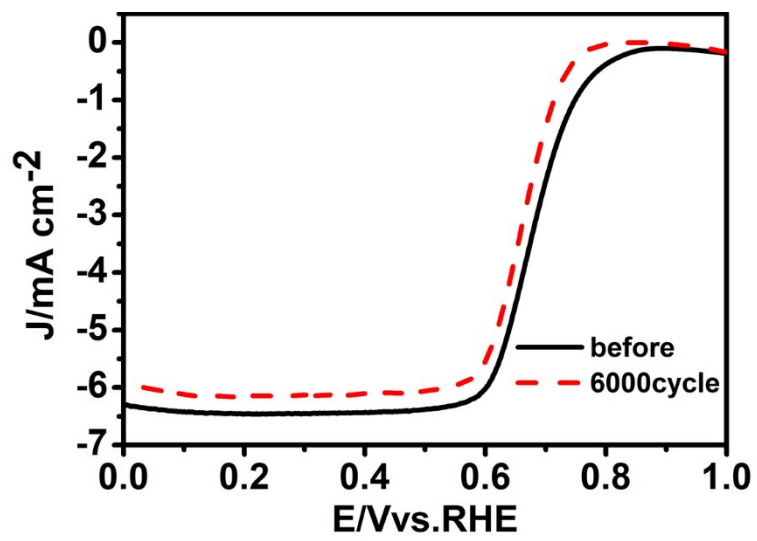

**Figure S7.** ORR stability test curves of the CoNiO<sub>2</sub>/SNC nanocomposites catalyst at

1600 rpm.



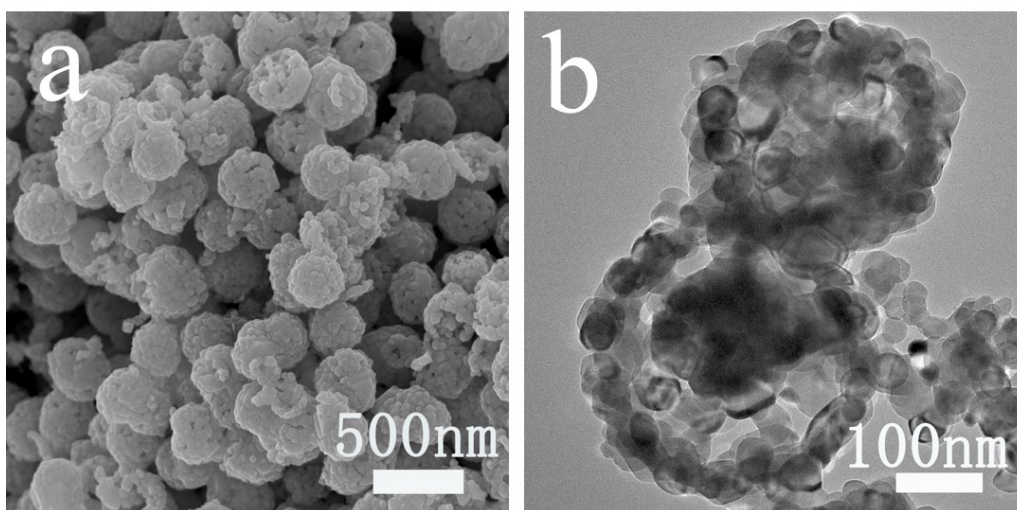

**Figure S8.** SEM(a) images, TEM(b) images of the  $\text{CoNiO}_2/\text{SNC}$  nanocomposites catalyst after 1000 cycles.

**Table S1.**

OER performance comparisons of some non-precious metal electrodes.

| Catalyst                                                | Electrolyte | Loading<br>(mg/cm <sup>2</sup> ) | Overpotential at<br>10 mA /cm <sup>2</sup><br>(Vvs.RHE) | References |
|---------------------------------------------------------|-------------|----------------------------------|---------------------------------------------------------|------------|
| CoNiO <sub>2</sub> /SNC<br>nanocomposites               | 0.1M KOH    | 0.8                              | 381                                                     | This work  |
| Fe <sub>3</sub> O <sub>4</sub> @CoO<br>Nanocrystals     | 0.1M KOH    | 0.31                             | 390                                                     | 1          |
| PPy/FeTCPP/Co<br>catalyst                               | 0.1M KOH    | 0.3                              | 380                                                     | 2          |
| Defect Graphene                                         | 0.1M KOH    | 0.08                             | 370                                                     | 3          |
| Co <sub>3</sub> O <sub>4</sub> /mildly oxidized<br>MCNT | 0.1M KOH    | —                                | 390                                                     | 4          |
| CoNiO <sub>2</sub> /SNC<br>nanocomposites               | 1M KOH      | 0.8                              | 280                                                     | This work  |
| PPy/FeTCPP/Co<br>catalyst                               | 1M KOH      | 0.3                              | 340                                                     | 2          |
| Defect Graphene                                         | 1M KOH      | 0.283                            | 340                                                     | 3          |
| Ni-N-O porous<br>interface<br>nanoparticles             | 1M KOH      | —                                | 300                                                     | 5          |
| NiS <sub>2</sub> /CoS <sub>2</sub> -O<br>Nanowires      | 1M KOH      | 0.2                              | 235                                                     | 6          |

## REFERENCES

- 1 Zhou L, Deng B, Jiang Z, Jiang ZJ. *Chem Commun (Camb)*. Jan 3 2019;55(4):525-528.
- 2 Yang J, Wang X, Li B, et al. *Adv. Funct. Mater.* 2017;27(17):1606497.
- 3 Jia Y, Zhang L, Du A, et al. *Adv. Mater.* Nov 2016;28(43):9532-9538.
- 4 Lu X, Zhao C. *Journal of Materials Chemistry A*. 2013;1(39):12053.
- 5 Huang J, Sun Y, Du X, et al. *Adv. Mater.* Sep 2018;30(39):e1803367.
- 6 Yin J, Li Y, Lv F, et al. *Adv. Mater.* Dec 2017;29(47).
